# Supplementary material for: Effect of Calcination Temperature and Chemical Composition of PAN-Derived Carbon Microfibers on N2, CO2, and CH4 Adsorption
Source: MDPI journal article supplement (doi:10.3390/ma14143914), 2021-07-13
Supplement: s1 [file s1]

Supplementary material

# Effect of Calcination Temperature and Chemical Composition of PAN-Derived Carbon Microfibers on N<sub>2</sub>, CO<sub>2</sub>, and CH<sub>4</sub> Adsorption

Reyna Ojeda-López <sup>1,2,\*</sup>, Guadalupe Ramos-Sánchez <sup>2,3</sup>, Cinthia García-Mendoza <sup>4</sup>, Diana C. S. Azevedo <sup>1</sup>, Ariel Guzmán-Vargas <sup>5</sup> and Carlos Felipe <sup>6,\*</sup>

<sup>1</sup> Laboratório de Pesquisa em Adsorção e Captura de CO<sub>2</sub> (LPACO<sub>2</sub>), Departamento de Engenharia Química, Universidade Federal do Ceará (UFC), Fortaleza 60455-760, CE, Brazil; diana@gpsa.ufc.br

<sup>2</sup> Departamento de Química, Universidad Autónoma Metropolitana-Iztapalapa (UAM-I), 09340 Mexico City, Mexico; gramossa@conacyt.mx

<sup>3</sup> CONACYT, Universidad Autónoma Metropolitana-Iztapalapa (UAM-I), 09340 Mexico City, Mexico

<sup>4</sup> Laboratorio de Nanotecnología, Centro de Investigación de Ciencia y Tecnología Avanzada de Tabasco (CICAT), División Académica de Ingeniería y Arquitectura, Universidad Juárez Autónoma de Tabasco (UJAT), 86690 Tabasco, Mexico; cinthia.garcia@ujat.mx

<sup>5</sup> Laboratorio de Investigación en Materiales Porosos, Catálisis Ambiental y Química Fina, ESIQIE, Instituto Politécnico Nacional (IPN), 07738 Mexico City, Mexico; aguzmanv@ipn.mx

<sup>6</sup> Departamento de Biociencias e Ingeniería, Centro Interdisciplinario de Investigaciones y Estudios sobre Medio Ambiente y Desarrollo (CIEMAD), Instituto Politécnico Nacional (IPN), 07340 Mexico City, Mexico

\* Correspondence: rol@xanum.uam.mx (R.O.-L.); cfelipe@ipn.mx (C.F.)

**Table S1.** Adsorption data for CMFs carbonized at 600, 700, and 800 °C.

| CMF-600           |                 |            | CMF-700           |                 |            | CMF-800           |                 |            |
|-------------------|-----------------|------------|-------------------|-----------------|------------|-------------------|-----------------|------------|
| Relative pressure | Volume (STP) cc | Time (min) | Relative pressure | Volume (STP) cc | Time (min) | Relative pressure | Volume (STP) cc | Time (min) |
| 2.78E-05          | 8.70370         | 1147.4     | 2.80E-05          | 65.8531         | 640.3      | 2.44E-05          | 122.7717        | 93.1       |
| 5.65E-05          | 13.9942         | 1356.8     | 4.47E-05          | 68.6694         | 1063.5     | 5.61E-05          | 126.5486        | 251.5      |
| 8.19E-05          | 17.5764         | 1831.8     | 6.76E-05          | 70.9139         | 1566.3     | 7.16E-05          | 127.5458        | 304.4      |
| 1.30E-04          | 21.3593         | 1907.2     | 1.20E-04          | 74.1724         | 1717.1     | 9.54E-05          | 128.5430        | 407.8      |
| 1.98E-04          | 24.7655         | 1939.9     | 2.43E-04          | 77.7294         | 1844.9     | 2.38E-04          | 132.0558        | 482.3      |
| 3.13E-04          | 28.5493         | 2118.1     | 4.76E-04          | 80.6591         | 1954.5     | 4.79E-04          | 134.7755        | 600.9      |
| 4.94E-04          | 32.7110         | 2560.2     | 7.23E-04          | 82.4226         | 2099.9     | 7.17E-04          | 136.3846        | 686.6      |
| 9.75E-04          | 38.5220         | 3049.8     | 9.63E-04          | 83.7847         | 2239.8     | 9.56E-04          | 137.8244        | 728.2      |
| 0.00268           | 47.0430         | 3173.8     | 0.00264           | 88.0817         | 2364.2     | 0.00236           | 141.6129        | 754.7      |
| 0.00458           | 51.6872         | 3351.4     | 0.00511           | 91.3303         | 2486.7     | 0.00486           | 145.0538        | 770.4      |
| 0.00857           | 57.0125         | 3457.3     | 0.00758           | 93.4119         | 2503.3     | 0.01046           | 148.4946        | 785.1      |
| 0.01840           | 63.4748         | 3507.7     | 0.00965           | 94.7718         | 2622.2     | 0.02149           | 150.7527        | 796.6      |
| 0.03687           | 69.1935         | 3721.1     | 0.02887           | 101.8279        | 2753.9     | 0.04830           | 153.9277        | 807.9      |
| 0.05552           | 72.8189         | 3773.5     | 0.05456           | 106.1074        | 2863.6     | 0.07477           | 156.3188        | 818.2      |
| 0.07693           | 74.4595         | 3824.8     | 0.08027           | 107.4922        | 2974.2     | 0.11187           | 158.3144        | 828.5      |
| 0.10351           | 75.4613         | 3876.1     | 0.10396           | 108.4307        | 3083.7     | 0.12845           | 159.0019        | 839.2      |
| 0.13051           | 76.2203         | 3927.4     | 0.13131           | 109.2889        | 3125.3     | 0.15916           | 160.0259        | 849.9      |
| 0.15475           | 76.8431         | 3978.7     | 0.15455           | 109.9160        | 3176.7     | 0.17932           | 160.6144        | 860.6      |
| 0.17824           | 77.3682         | 4030.6     | 0.17856           | 110.4848        | 3363.2     | 0.20468           | 161.2593        | 871.3      |

|         |         |        |         |          |        |         |          |        |
|---------|---------|--------|---------|----------|--------|---------|----------|--------|
| 0.20224 | 77.8417 | 4081.3 | 0.20209 | 110.9840 | 3374.2 | 0.22755 | 161.7886 | 882.5  |
| 0.22667 | 78.2856 | 4132.6 | 0.22657 | 111.4573 | 3385.7 | 0.25176 | 162.3028 | 892.7  |
| 0.25132 | 78.6881 | 4183.9 | 0.25137 | 111.8992 | 3396.6 | 0.27615 | 162.7974 | 903.4  |
| 0.27601 | 79.0697 | 4251.4 | 0.27602 | 112.3102 | 3407.1 | 0.30115 | 163.2479 | 914.1  |
| 0.30084 | 79.4285 | 4271.1 | 0.30072 | 112.7015 | 3419.8 | 0.34934 | 164.0340 | 924.8  |
| 0.34946 | 80.0226 | 4281.5 | 0.34998 | 113.3976 | 3420.3 | 0.40041 | 164.8089 | 935.5  |
| 0.39974 | 80.6158 | 4292.1 | 0.39909 | 114.0630 | 3431.2 | 0.42442 | 165.1694 | 946.2  |
| 0.42482 | 80.9555 | 4302.6 | 0.42421 | 114.4194 | 3441.9 | 0.45051 | 165.5516 | 956.7  |
| 0.44963 | 81.2776 | 4311.1 | 0.45042 | 114.7779 | 3452.5 | 0.47554 | 165.9075 | 967.2  |
| 0.47512 | 81.6035 | 4322.1 | 0.47423 | 115.1017 | 3463.1 | 0.50060 | 166.2553 | 977.7  |
| 0.50018 | 81.9133 | 4333.1 | 0.50035 | 115.4478 | 3473.9 | 0.52556 | 166.6045 | 988.2  |
| 0.52559 | 82.2305 | 4342.2 | 0.52503 | 115.7641 | 3484.2 | 0.55069 | 166.9394 | 999.1  |
| 0.55019 | 82.5390 | 4352.9 | 0.55011 | 116.0774 | 3495.3 | 0.57535 | 167.2706 | 1010.4 |
| 0.57523 | 82.8355 | 4363.6 | 0.57496 | 116.3859 | 3505.7 | 0.60108 | 167.5986 | 1020.9 |
| 0.60009 | 83.1260 | 4374.2 | 0.60003 | 116.6754 | 3516.2 | 0.62559 | 167.8952 | 1031.8 |
| 0.62505 | 83.4019 | 4384.7 | 0.62486 | 116.9513 | 3527.2 | 0.65076 | 168.1778 | 1042.7 |
| 0.64992 | 83.6806 | 4395.3 | 0.64986 | 117.2250 | 3546.8 | 0.67608 | 168.4589 | 1053.6 |
| 0.67550 | 83.9667 | 4405.7 | 0.67510 | 117.4808 | 3556.6 | 0.70108 | 168.7282 | 1064.5 |
| 0.70008 | 84.2317 | 4416.2 | 0.72482 | 117.9681 | 3567.1 | 0.72570 | 168.9861 | 1075.4 |
| 0.74996 | 84.6807 | 4427.2 | 0.74981 | 118.2172 | 3581.8 | 0.75072 | 169.2546 | 1086.3 |
| 0.79846 | 85.2818 | 4446.5 | 0.79981 | 118.7772 | 3592.3 | 0.77579 | 169.5342 | 1097.2 |
| 0.85116 | 85.9621 | 4456.6 | 0.84853 | 119.4575 | 3603.2 | 0.80087 | 169.8538 | 1108.1 |
| 0.89866 | 86.9397 | 4467.1 | 0.89845 | 120.5255 | 3614.2 | 0.84974 | 170.5915 | 1118.7 |
| 0.94728 | 88.9547 | 4481.8 | 0.94630 | 122.6257 | 3620.1 | 0.89944 | 171.8030 | 1129.3 |
| 0.96922 | 91.1361 | 4492.3 | 0.96862 | 124.8987 | 3626.3 | 0.94783 | 174.1939 | 1139.9 |
| 0.98589 | 95.2468 | 4503.2 | 0.98565 | 128.9696 | 3632.3 | 0.96997 | 176.7669 | 1150.5 |
| 0.96218 | 92.2326 | 4514.2 | 0.96123 | 125.7080 | 3642.2 | 0.98686 | 181.5447 | 1161.1 |
| 0.93768 | 90.0310 | 4524.8 | 0.93696 | 123.3262 | 3652.1 | 0.96379 | 177.8350 | 1171.7 |
| 0.88620 | 88.1025 | 4535.4 | 0.88582 | 121.0879 | 3662.8 | 0.93976 | 174.9832 | 1182.3 |
| 0.83079 | 87.1958 | 4546.7 | 0.83026 | 119.9601 | 3673.7 | 0.88852 | 172.4131 | 1192.7 |
| 0.77858 | 86.6771 | 4556.6 | 0.77804 | 119.2861 | 3684.2 | 0.83261 | 171.1136 | 1203.1 |
| 0.72821 | 86.3208 | 4567.2 | 0.75132 | 119.0052 | 3694.8 | 0.78003 | 170.3449 | 1213.5 |
| 0.70165 | 86.1454 | 4577.8 | 0.70069 | 118.5739 | 3705.2 | 0.75289 | 170.0168 | 1224.2 |
| 0.67702 | 86.0059 | 4588.4 | 0.67626 | 118.3835 | 3815.8 | 0.72791 | 169.7578 | 1234.9 |
| 0.65187 | 85.8840 | 4599.2 | 0.64901 | 118.1951 | 3926.3 | 0.70249 | 169.5180 | 1245.6 |
| 0.62534 | 85.7643 | 4610.3 | 0.60117 | 117.8952 | 3936.9 | 0.67729 | 169.3016 | 1256.3 |
| 0.60130 | 85.6546 | 4620.8 | 0.59981 | 117.8558 | 3947.5 | 0.65225 | 169.0988 | 1267.6 |
| 0.60052 | 85.6348 | 4631.6 | 0.57311 | 117.7050 | 3958.4 | 0.65137 | 169.0556 | 1277.7 |
| 0.57498 | 85.5519 | 4642.4 | 0.52517 | 117.4105 | 3969.1 | 0.62558 | 168.8836 | 1288.4 |
| 0.52576 | 85.3618 | 4652.7 | 0.52462 | 117.3778 | 3979.7 | 0.57792 | 168.5344 | 1299.1 |
| 0.52514 | 85.3258 | 4663.1 | 0.49736 | 117.2174 | 3990.2 | 0.57613 | 168.4851 | 1309.8 |
| 0.51086 | 85.2713 | 4673.3 | 0.46245 | 116.9851 | 4000.7 | 0.54954 | 168.3018 | 1320.5 |
| 0.47615 | 85.1436 | 4683.6 | 0.44878 | 116.8216 | 4011.2 | 0.50284 | 167.9521 | 1331.2 |
| 0.45024 | 85.0188 | 4694.5 | 0.41421 | 116.2450 | 4022.3 | 0.50018 | 167.8952 | 1342.1 |
| 0.45009 | 84.9798 | 4705.4 | 0.39750 | 115.7751 | 4033.5 | 0.48708 | 167.7953 | 1353.2 |
| 0.44349 | 84.9463 | 4716.3 | 0.38684 | 115.5170 | 4044.7 | 0.45065 | 167.3166 | 1363.9 |

---

|         |         |        |         |          |        |         |          |        |
|---------|---------|--------|---------|----------|--------|---------|----------|--------|
| 0.41326 | 84.7552 | 4727.2 | 0.38033 | 115.3578 | 4054.9 | 0.43665 | 167.1254 | 1374.8 |
| 0.41227 | 84.6781 | 4738.1 | 0.37458 | 115.2398 | 4065.1 | 0.40431 | 166.2136 | 1385.7 |
| 0.39885 | 84.5318 | 4749.8 | 0.36223 | 115.0060 | 4075.9 | 0.39906 | 166.0360 | 1396.6 |
| 0.37071 | 84.1318 | 4759.9 | 0.34997 | 114.7695 | 4086.3 | 0.38712 | 165.6807 | 1407.5 |
| 0.36178 | 83.9877 | 4770.4 | 0.34331 | 114.6464 | 4096.8 | 0.36288 | 165.0838 | 1418.4 |
| 0.34967 | 83.8099 | 4780.9 | 0.33736 | 114.5401 | 4107.1 | 0.35031 | 164.8155 | 1429.3 |
| 0.33727 | 83.6302 | 4791.4 | 0.33086 | 114.4318 | 4117.5 | 0.33787 | 164.5735 | 1440.2 |
| 0.32482 | 83.4635 | 4801.7 | 0.32494 | 114.3309 | 4127.9 | 0.32522 | 164.3441 | 1451.5 |
| 0.30004 | 83.1412 | 4812.1 | 0.30076 | 113.9670 | 4138.2 | 0.31288 | 164.1258 | 1461.8 |
| 0.25049 | 82.5447 | 4822.3 | 0.25094 | 113.2372 | 4148.6 | 0.30005 | 163.9058 | 1472.6 |
| 0.20038 | 81.9270 | 4832.4 | 0.20053 | 112.4151 | 4158.9 | 0.25278 | 162.8187 | 1483.4 |
| 0.15067 | 81.1875 | 4842.5 | 0.15051 | 111.4210 | 4169.2 | 0.20095 | 161.6028 | 1494.2 |
| 0.10080 | 80.1856 | 4853.1 | 0.10088 | 110.0911 | 4179.8 | 0.15071 | 160.3947 | 1505.4 |
| 0.07480 | 79.4646 | 4863.7 | 0.07476 | 109.1209 | 4190.3 | 0.10141 | 158.3814 | 1516.2 |
| 0.05048 | 78.5158 | 4875.6 | 0.05052 | 107.8569 | 4203.2 | 0.07501 | 156.9049 | 1527.6 |

---
